# Supplementary material
Source: PubMed Central journal article supplement (PMC5155349)
Supplement: supp_tpc.16.00717_TPC2016-00717-RAR1_Supplemental_DataRev.pdf [file supp_tpc.16.00717_TPC2016-00717-RAR1_Supplemental_DataRev.pdf]

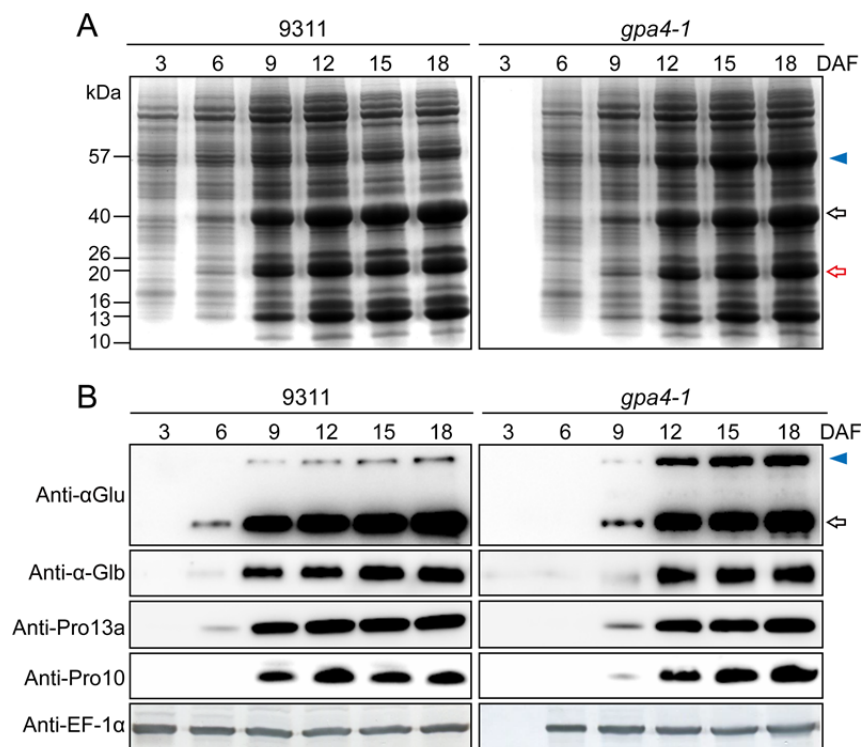

**Supplemental Figure 1.** Time-Course Analysis of Storage Proteins during Endosperm Development of the Wild-type 9311 and the *gpa4-1* Mutant.

**(A)** SDS-PAGE analyses of seed storage proteins during wild-type and *gpa4-1* endosperm development. Blue triangles indicate the 57-kDa proglutelins. Black and red hollow arrows denote the acidic and basic subunit, respectively. DAF, days after flowering.

**(B)** Immunoblot analysis showing the delayed accumulation of glutelins, 26-kDa  $\alpha$ -globulins, 13-kDa and 10-kDa prolamins in the *gpa4-1* endosperm.

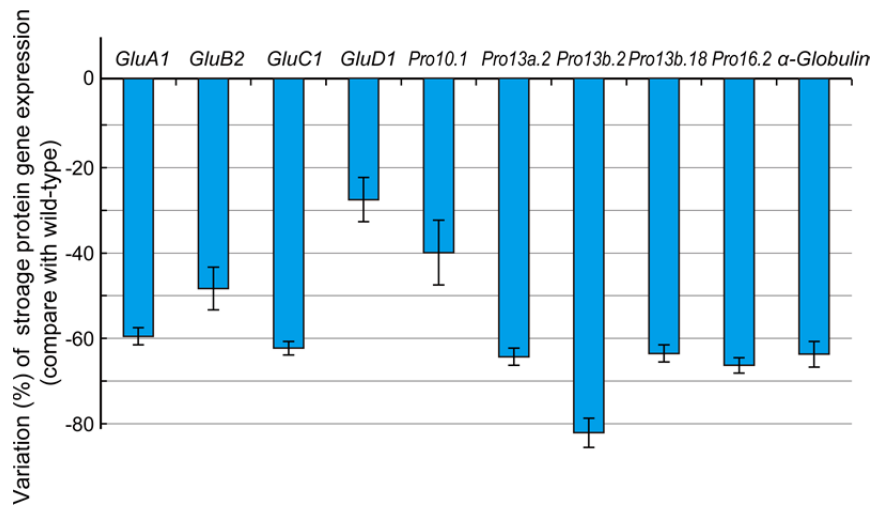

**Supplemental Figure 2.** RT-qPCR Assay of the Expression of Representative Genes Coding for Storage Proteins in 12 DAF Endosperm.

All of the genes analyzed were down-regulated in the *gpa4-1* mutant compared with wild type. DAF, days after flowering. Values are mean  $\pm$  SD.  $n = 3$ .

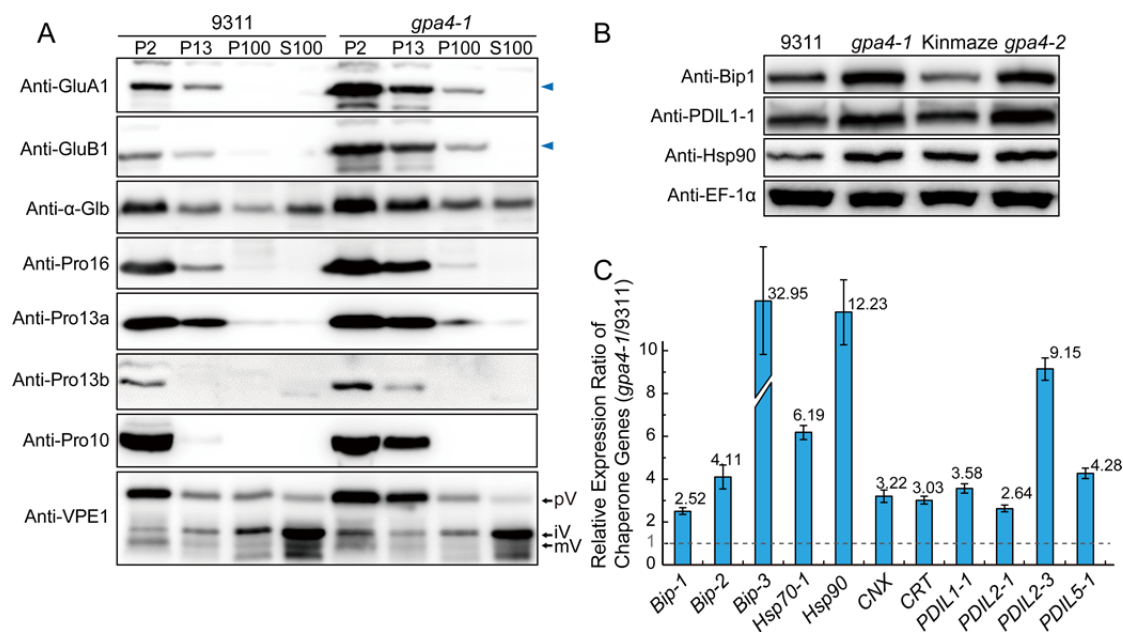

**Supplemental Figure 3.** Immunoblot Analyses Showing Defective Export of Storage Proteins from the ER in *gpa4-1*.

**(A)** Immunoblot analysis of GluA1, GluB1,  $\alpha$ -globulin, 16-kD prolamin (Pro16), 13-kD prolamin-a (Pro13a), 13-kD prolamin-b (Pro13b), 10-kD prolamin (Pro10), and VPE1 showing their distribution in various differential centrifugation fractions using their specific antibodies. P2, pellet obtained following centrifugation at 2000g; P13, pellet obtained following centrifugation at 13,000g; P100, pellet obtained following centrifugation at 100,000g; S100, supernatant obtained following centrifugation at 100,000g. Blue triangles indicate the 57-kD proglutelins. Arrows indicate different forms of VPE1. pV, VPE1 precursor; iV, intermediate VPE1; mV, mature VPE1.

**(B)** Immunoblot analysis using specific antibodies for chaperone proteins. The accumulation of Bip1, PDIL1-1, and Hsp90 proteins is increased in the *gpa4* mutants compared with the corresponding wild types.

**(C)** Expression analysis of ER stress response-related genes in 12 DAF endosperm. The transcript levels of these genes are highly elevated in the *gpa4-1* mutant. DAF: days after flowering. Values are mean  $\pm$  SD. *n* = 3.

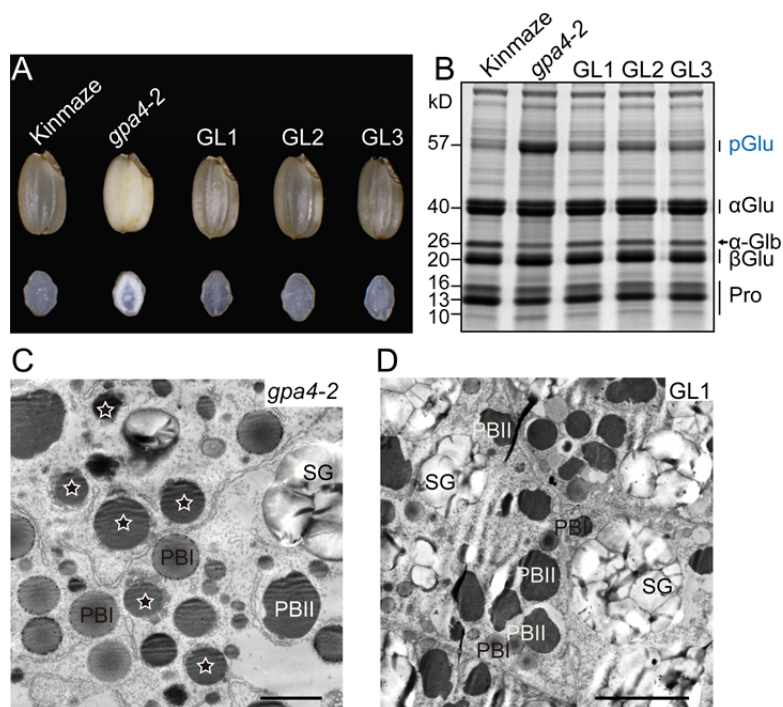

**Supplemental Figure 4.** Rescue of the *gpa4-2* Mutant Phenotype by the *GFP-GOT1B* Fusion Construct.

(A) to (D) The fusion construct *GFP-GOT1B* under the control of *GOT1B* endogenous promoter rescues the grain appearance (A), the storage protein composition pattern (B), and the storage protein trafficking defects (C and D) of the *gpa4-2* mutant. GL1 to GL3 denote the grains from three independent T1 transgenic lines. Stars represent the first type of novel structure with a glutelin core and a prolamins periphery. Bars = 2 μm in (C), and 5 μm in (D).

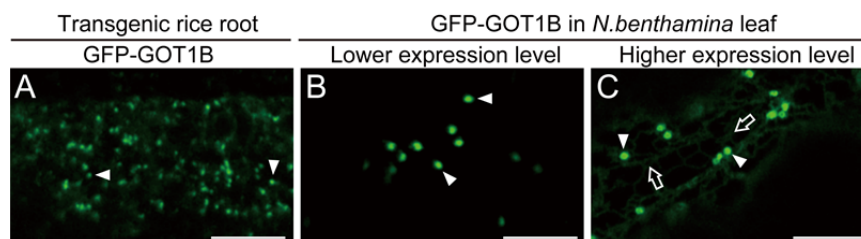

**Supplemental Figure 5.** Localization Pattern of GFP-GOT1B Fusion Protein. **(A)** GFP-GOT1B is localized in the punctate structures in the root cells of *GFP-GOT1B* transgenic lines. **(B)** and **(C)** Localization of GFP-GOT1B in *N. benthamiana* leaf epidermal cells. **(B)** GFP-GOT1B shows a typical punctate pattern in cells with lower expression. **(C)** Faint signals in ER networks are observed in cells with higher expression. Triangles indicate the punctate structures of GFP-GOT1B. Arrows indicate the faint signals of GFP-GOT1B in ER networks. Bars = 10  $\mu$ m.

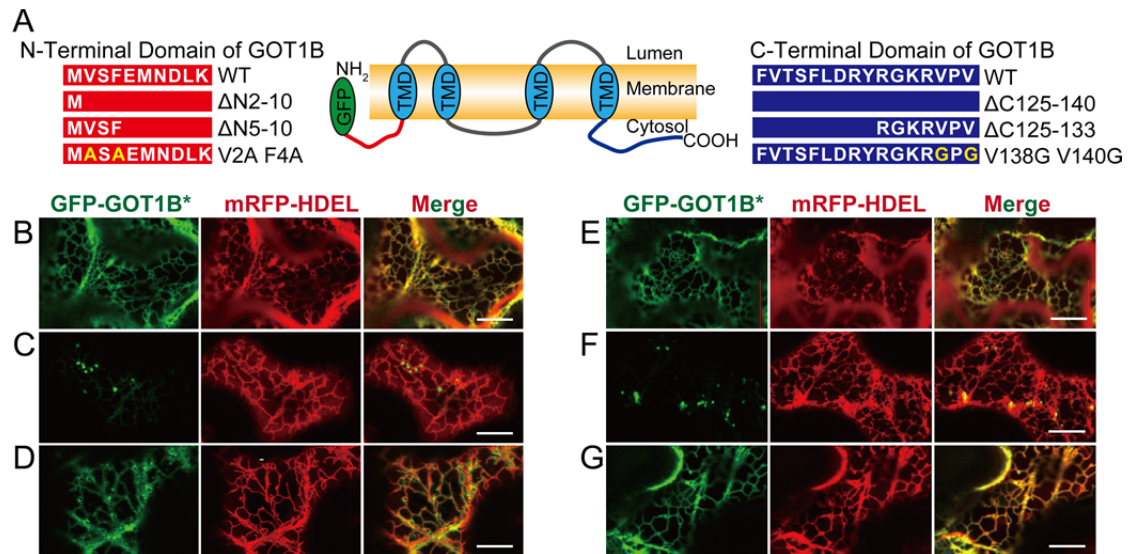

**Supplemental Figure 6.** Both the N- and C-termini Are Essential for the Proper Localization of GOT1B.

(A) Scheme of GOT1B N- and C- terminus mutation constructs for expression in the leaf epidermal cells of *N. benthamiana*. TMD, transmembrane domain.

(B) to (G) Typical subcellular localization patterns of the various GFP-fused GOT1B mutant forms co-expressed with a known ER marker (mRFP-HDEL) in *N. benthamiana* leaf cells. Bars = 10 μm in (B to G). GFP-GOT1B\* indicates different mutant isoforms of GFP-GOT1B as shown in (A).

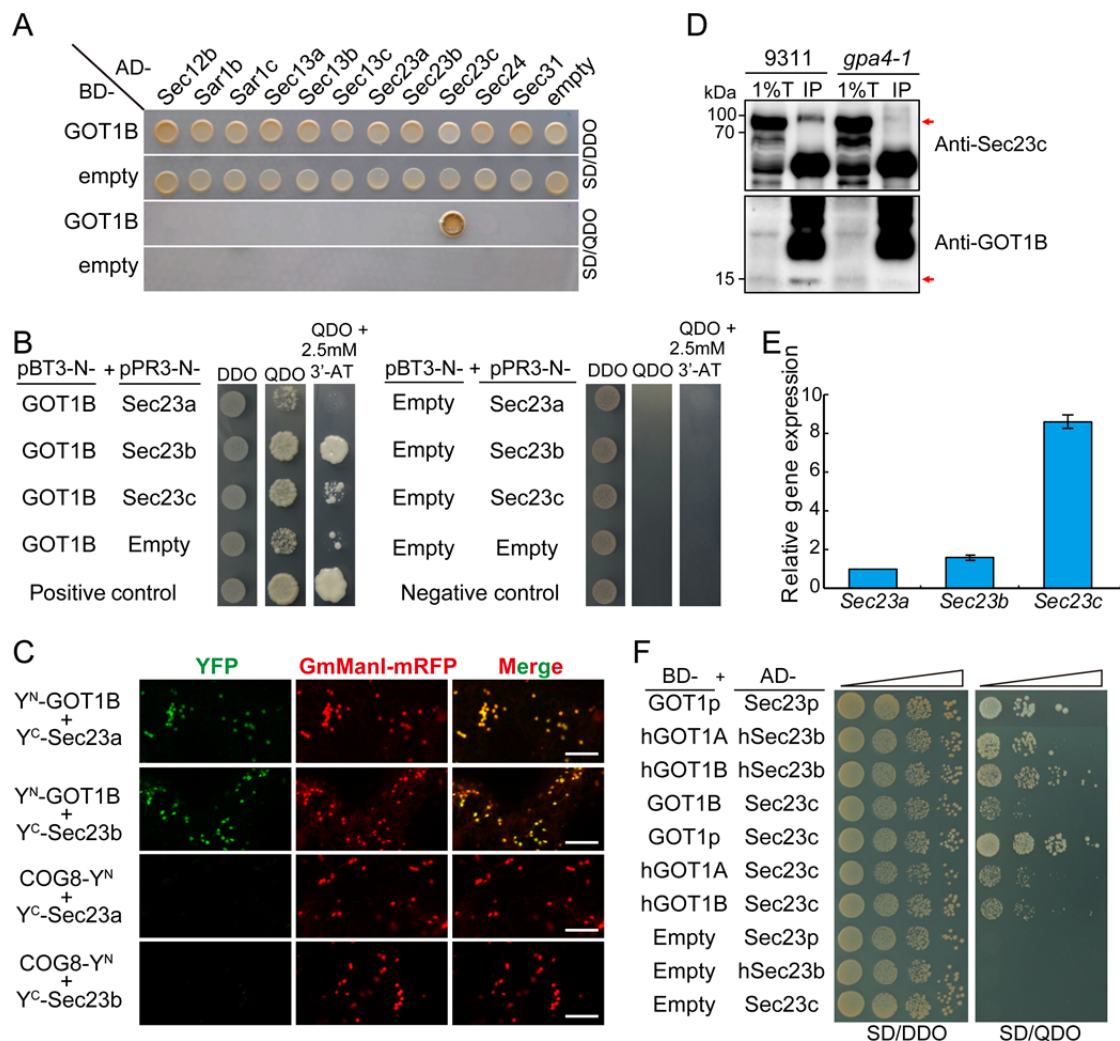

### Supplemental Figure 7. Interaction between GOT1B and Sec23.

(A) Y2H assay showing that GOT1B specifically interacts with the COPII component Sec23c.

(B) GOT1B interacts with Sec23b and Sec23c in the split-ubiquitin based Y2H assay.

(C) BiFC assay showing that GOT1B can interact with both Sec23b and Sec23c in leaf epidermal cells of *N. benthamiana*. The Golgi-localized membrane proteins COG3 and COG8 (a pair of interacting proteins, Tan et al., 2016) were used as the negative control. Bars = 10  $\mu$ m.

(D) No detectable Sec23c protein was immunoprecipitated by anti-Sar1b antibodies in the *gpa4-1* mutant.

(E) RT-qPCR assay showing that Sec23c has the highest expression in 12 DAF endosperm of the wild type.

(F) Y2H assay showing that Got1p and human Got1 (hGot1a and hGot1b) not only interact with their corresponding Sec23, but also cross interact with rice Sec23c.

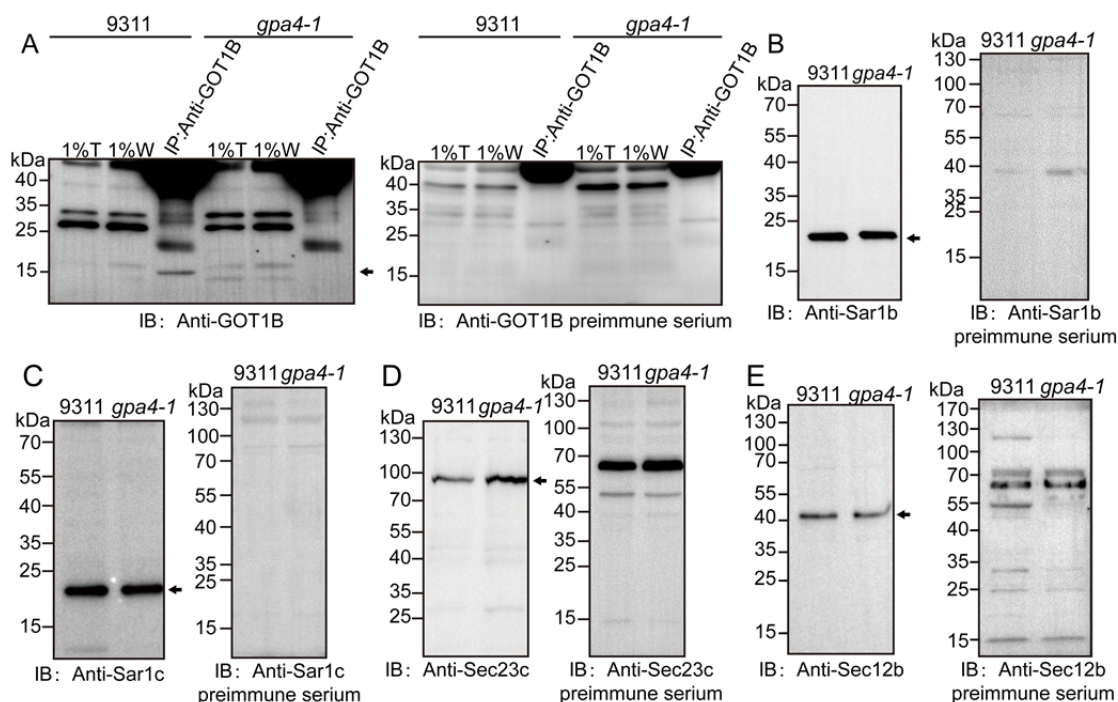

**Supplemental Figure 8. Immunoblot Analyses Showing the Specificity of Antibodies.**

(A) to (E) Immunoblot analyses showing the specificity of antibodies for GOT1B (A), Sar1b (B), Sar1c (C), Sec23c (D), and Sec12b (E). (A) GOT1B protein can be detected only in IP sample precipitated by anti-GOT1B antibodies. Total extracts were loaded for immunoblot assays in (B) to (E). T, total extract; W, wash-off solution; IP, immunoprecipitation. Arrows indicate the corresponding protein bands.



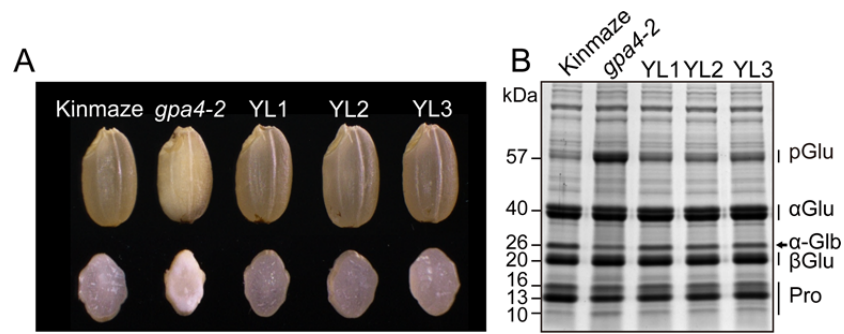

**Supplemental Figure 9.** Rescue of the *gpa4-2* Mutant Phenotypes by Yeast *GOT1*.

**(A)** and **(B)** Yeast *Got1* rescues the grain appearance **(A)**, and the storage protein composition pattern **(B)** of the *gpa4-2* mutant. YL1 to YL3 denote the grains from three independent T1 transgenic lines.

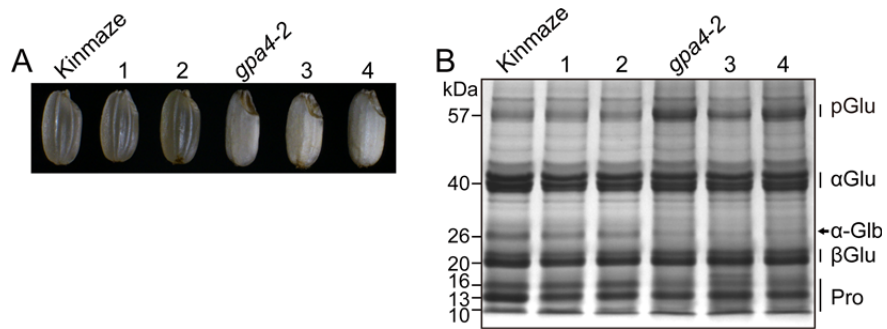

**Supplemental Figure 10.** The Seeds of Transgenic Rice Lines Expressing *AtSar1b-GFP* Show No Difference from Their Corresponding Recipient Plants. **(A)** and **(B)** The grain appearance **(A)** and the storage protein composition pattern **(B)** of Kinmaze and *gpa4-2* transformed with *AtSar1b-GFP*. 1 to 4 are transgenic lines using Kinmaze (1 and 2) or *gpa4-2* (3 and 4) as the recipients, respectively.

**Supplemental Table 1.** Comparison of Important Agronomic Traits between Wild Type and *gpa4* Mutants

| Characteristic             | 9311         | <i>gpa4-1</i>  | Kinmaze      | <i>gpa4-2</i>  |
|----------------------------|--------------|----------------|--------------|----------------|
| Plant height (cm)          | 114.1 ± 2.4  | 95.2 ± 4.7**   | 95.7 ± 2.8   | 94.3 ± 1.6     |
| Panicle length (cm)        | 23.26 ± 1.38 | 23.19 ± 0.84   | 19.11 ± 1.33 | 19.20 ± 1.20   |
| Tiller number              | 6.58 ± 1.57  | 5.94 ± 1.58    | 6.86 ± 2.25  | 6.29 ± 1.76    |
| 1,000-grain weight (g)     | 30.42 ± 0.01 | 21.29 ± 0.03** | 22.71 ± 0.02 | 19.04 ± 0.13** |
| Protein content (mg/grain) | 2.88 ± 0.05  | 1.96 ± 0.02**  | 2.05 ± 0.01  | 1.62 ± 0.13**  |
| Amylose content (mg/grain) | 4.56 ± 0.14  | 2.83 ± 0.05**  | 3.02 ± 0.02  | 2.52 ± 0.10**  |

The asterisks indicate statistical significance between the *gpa4* mutants and the corresponding wild type, as determined by a Student's *t*-test (\*\**P* < 0.01).

---

**Supplemental Table 2.** Segregation of Mutant Phenotype in Reciprocal Crosses between the Wild Type and the *gpa4-1* Mutant.

| Cross               | Normal | 57H/Floury | $\chi^2_{3:1}$ |
|---------------------|--------|------------|----------------|
| <i>gpa4-1</i> /9311 | 175    | 64         | 0.31           |
| 9311/ <i>gpa4-1</i> | 135    | 51         | 0.46           |

**Supplemental Table 3.** The Distribution of COPII-Related Proteins in the Endomembrane System

|        |               | P2             | P13            | P100           | S100         |
|--------|---------------|----------------|----------------|----------------|--------------|
| Sar1b  | 9311          | 5.53 ± 0.25    | 20.17 ± 1.32   | 40.43 ± 1.83   | 33.88 ± 1.72 |
|        | <i>gpa4-1</i> | 13.92 ± 0.61** | 27.07 ± 1.56** | 25.09 ± 1.21** | 33.91 ± 1.84 |
| Sar1c  | 9311          | 43.15 ± 2.11   | 10.26 ± 0.53   | 30.95 ± 1.75   | 15.64 ± 0.94 |
|        | <i>gpa4-1</i> | 33.96 ± 1.52** | 17.12 ± 0.68** | 30.09 ± 1.59   | 18.83 ± 1.32 |
| Sec23c | 9311          | 15.07 ± 0.65   | 14.16 ± 0.89   | 16.16 ± 1.18   | 54.60 ± 2.73 |
|        | <i>gpa4-1</i> | 14.85 ± 0.71   | 13.54 ± 0.56   | 13.64 ± 0.94   | 57.96 ± 3.15 |
| Sec12b | 9311          | 17.23 ± 0.75   | 34.91 ± 1.12   | 43.17 ± 1.56   | 4.68 ± 0.23  |
|        | <i>gpa4-1</i> | 18.31 ± 0.83   | 34.24 ± 1.24   | 41.50 ± 1.63   | 4.93 ± 0.25  |

The asterisks indicate statistical significance between the wild type and the *gpa4-1* mutant, as determined by a Student's *t*-test (\*\**P* < 0.01).

**Supplemental Table 4.** Comparison of Important Agronomic Traits between AtSar1b-GFP Transgenic Rice Lines and Their Corresponding Recipient Plants.

|                       | Kinmaze      | <i>AtSar1b-GFP</i><br>/Kinmaze | <i>gpa4-2</i> | <i>AtSar1b-GFP</i><br>/ <i>gpa4-2</i> |
|-----------------------|--------------|--------------------------------|---------------|---------------------------------------|
| Plant height (cm)     | 93.8 ± 1.4   | 92.8 ± 2.6                     | 92.0 ± 1.4    | 91.5 ± 2.3                            |
| Panicle length (cm)   | 19.10 ± 1.26 | 19.23 ± 1.34                   | 19.45 ± 1.19  | 19.28 ± 1.23                          |
| Tiller number         | 6.87 ± 1.20  | 6.56 ± 1.65                    | 6.13 ± 1.20   | 6.35 ± 1.56                           |
| 1000-grain weight (g) | 22.69 ± 0.11 | 22.55 ± 0.16                   | 18.89 ± 0.15  | 18.76 ± 0.13                          |

**Supplemental Table 5. Primers Used in This Study.**

| Usage                                     | Primer name                    | Sequence                        |
|-------------------------------------------|--------------------------------|---------------------------------|
| Primers for fine mapping                  | G1-F                           | 5' TTCCCACCACCTCCTCCG 3'        |
|                                           | G1-R                           | 5' GCCACTCCTCCACGCACA 3'        |
|                                           | G3-F                           | 5' CTGCCCCCTTGCCCCCTTC 3'       |
|                                           | G3-R                           | 5' CTCACCACGCCACCCTCG 3'        |
|                                           | G4-F                           | 5' TGCTGCTCCGCTACACAAA 3'       |
|                                           | G4-R                           | 5' CCTCCTTCCCCTCCTCACT 3'       |
|                                           | G9-F                           | 5' TAGCAGCTACCTCACCGC 3'        |
|                                           | G9-R                           | 5' ACCAGGACCTCCCGACCC 3'        |
|                                           | G11-F                          | 5' ACCTGCGAACCACCACGGAC 3'      |
|                                           | G11-R                          | 5' GCGAGAGGCGAAGGAAATAG 3'      |
|                                           | G15-F                          | 5' GTGCTGCTTTAGCCGTTTAC 3'      |
| G15-R                                     | 5' TCAGGGTGTGGGAATGGTAG 3'     |                                 |
| RT-qPCR primers for storage protein genes | GluA1-F                        | 5' TGATGGTGAAGTGCCAGTTGTTGC 3'  |
|                                           | GluA1-R                        | 5' ACGCCTGTATGCTTGAGGGTTTCT 3'  |
|                                           | GluB2-F                        | 5' TGCCTTCGCCCTGGACAACACTATT 3' |
|                                           | GluB2-R                        | 5' TGGTAAGGCGCGGAATACTGAGTT 3'  |
|                                           | GluC1-F                        | 5' ATGTAAAGTTCAACCGCGCGATG 3'   |
|                                           | GluC1-R                        | 5' TCTCGTTGATCTGCCACTCAGCAT 3'  |
|                                           | GluD1-F                        | 5' AAATGAGCAGTTTTCGATGCGCTGG 3' |
|                                           | GluD1-R                        | 5' TGTTGAGTATCGAGGCACCACAA 3'   |
|                                           | Pro10.1-F                      | 5' GTTGCATGCAGCTACAAGGCATGA 3'  |
|                                           | Pro10.1-R                      | 5' TCTGCATCGCCATCTTCACCATCT 3'  |
|                                           | Pro13a.2-F                     | 5' TTCAGGCGATTGTGCAGCAACTAC 3'  |
|                                           | Pro13a.2-R                     | 5' GGATGGCAAGTTTAAGGCCAGCAA 3'  |
|                                           | Pro13b.2-F                     | 5' GTATAGCATTGCGGCAAGCACCTT 3'  |
|                                           | Pro13b.2-R                     | 5' ATGGCCTGGACAACGTTAATGTCC 3'  |
|                                           | Pro13b.18-F                    | 5' ACATTGTTTCAGGCCATAGTGCAGC 3' |
|                                           | Pro13b.18-R                    | 5' ACAGAGCTTGAGCTTGAGCCAGAT 3'  |
| Pro16.2-F                                 | 5' GCTCTCAATTTGCCCTCCATGTGT 3' |                                 |
| Pro16.2-R                                 | 5' TGGTACACACTACCAAGAACCGCA 3' |                                 |
| α-Globulin-F                              | 5' GATCAGTTCATCACCAACAAAACA 3' |                                 |
| α-Globulin-R                              | 5' TCCAGAACGCACAAAATCAT 3'     |                                 |
| RT-qPCR primers for internal control      | Ubiquitin-F                    | 5' TCTTCCCCTTCAGGACGTGT 3'      |
|                                           | Ubiquitin-R                    | 5' GGACCAAAGGTCACCACCAT 3'      |

|                                                          |                   |                                              |
|----------------------------------------------------------|-------------------|----------------------------------------------|
| RT-qPCR primers for <i>GPA4</i> and its homologous genes | GPA4-F            | 5' TGTTCTGCTCTTCACTGGTGTGGT 3'               |
|                                                          | GPA4-R            | 5' AGCCTAGCCCAATCTTCTTGAGGT 3'               |
|                                                          | Os10g0337600-F    | 5' ATTGGGATAGGGCTGACAGGCTTT 3'               |
|                                                          | Os10g0337600-R    | 5' GCCTGACAGGAAGAGAATATTGCCCA 3'             |
|                                                          | Os02g0602800-F    | 5' TGCTTGGTTGGCAATCTATGTGGC 3'               |
|                                                          | Os02g0602800-R    | 5' ACAGGCCATCGGACAAAGAGAAGA 3'               |
| <i>GPA4</i> cDNA cloning                                 | GPA4-cDNA-F       | 5' GAAAACGCCGCTACGCTACCAC 3'                 |
|                                                          | GPA4-cDNA-R       | 5' GCTCAAGCATAAGCCGACAAGG 3'                 |
| <i>GPA4</i> gDNA cloning                                 | GPA4-gDNA-F       | 5' GCACCTAACTGTTTCACTTTCTG 3'                |
|                                                          | GPA4-gDNA-R       | 5' CCTCTACTGCTACCTTGTC 3'                    |
| Membrane protein verification                            | 1305GOT1B-F       | 5' TCTAGAATGGTTTCCTTCGAGATGAA 3'             |
|                                                          | 1305GOT1B-R       | 5' AGATCTGCTCAAGCATAAGCCGACAA 3'             |
|                                                          | 1305OsTip3-1-F    | 5' TCTAGAATGAGCACGGCGGCGGCGA 3'              |
|                                                          | 1305OsTip3-1-R    | 5' AGATCTCTAGTAGTCCTCCGCGC 3'                |
| Subcellular localization                                 | 1305GFP-GOT1B-F   | 5' TGGACGAGCTGTACAGATCTATGGTTTCCTTCGAGATG 3' |
|                                                          | 1305GFP-GOT1B-R   | 5' GGGCGGCCGCTTTAAGATCTCTACACTGGAACCCGTTT 3' |
|                                                          | 1305-GOT1B-GF-P-F | 5' TCTAGAATGGTTTCCTTCGAGATG 3'               |
|                                                          | 1305-GOT1B-GF-P-R | 5' GGATCCCACTGGAACCCGTTTTCC 3'               |
|                                                          | pGBT9-GOT1B-F     | 5' GAATTCATGGTTTCCTTCGAGATGA 3'              |
|                                                          | pGBT9-GOT1B-R     | 5' GGATCCGCTCAAGCATAAGCCGACAA 3'             |
| Y2H assay                                                | pGADSec12b-F      | 5' GGAGGCCAGTGAATTCATGGCGGCGGCGGCGGC 3'      |
|                                                          | pGADSec12b-R      | 5' CACCCGGGTGGAATTCTCAATGTAGAAACCTTGC 3'     |
|                                                          | pGADSar1b-F       | 5' GAATTCATGTTCTGTGGGACTGG 3'                |
|                                                          | PGADSar1b-R       | 5' GGATCCCTACTTGATGTACTGGGA 3'               |
|                                                          | pGADSar1c-F       | 5' GAATTCATGTCGTTTCTGCTGGAT 3'               |
|                                                          | pGADSar1c-R       | 5' GGATCCCTACTTGATGTACTGTGA 3'               |
|                                                          | pGADSec13a-F      | 5' GGAGGCCAGTGAATTCATGCCTCCCCATAAGATA 3'     |
|                                                          | pGADSec13a-R      | 5' CACCCGGGTGGAATTCCTAAGCCTCAACAGTGGT 3'     |
|                                                          | pGADSec13b-F      | 5' GGAGGCCAGTGAATTCATGTCGTCAAACAAGATA 3'     |
|                                                          | pGADSec13b-R      | 5' CACCCGGGTGGAATTCCTATGGCTCCACCTTGGT 3'     |
|                                                          | pGADSec13c-F      | 5' GGAGGCCAGTGAATTCATGTCATCGAAGAAAATA 3'     |
|                                                          | pGADSec13c-R      | 5' CACCCGGGTGGAATTCCTACTGCTCAGCCTTCTT 3'     |
|                                                          | pGADSec23a-F      | 5' GGAGGCCAGTGAATTCATGGAGGAGACGTCGACG 3'     |
|                                                          | pGADSec23a-R      | 5' CACCCGGGTGGAATTCCTAGCTTGGTTCAGGTGG 3'     |



|                                             |                |                                              |
|---------------------------------------------|----------------|----------------------------------------------|
|                                             | pGADSec23b-F   | 5' GGAGGCCAGTGAATTCATGTCTGAGTTCCTGGAT 3'     |
|                                             | pGADSec23c-R   | 5' CACCCGGGTGGAATTCCTACTGAACTGCCAGCCG 3'     |
|                                             | pGADSec23c-F   | 5' GGAGGCCAGTGAATTCATGGCGGCCGATCCCTCC 3'     |
|                                             | pGADSec23c-R   | 5' CACCCGGGTGGAATTCCTTAGGACTGAACGGCCAG 3'    |
|                                             | pGADSec24-F    | 5' GGAGGCCAGTGAATTCATGCAACCACCGATGAGA 3'     |
|                                             | pGADSec24-R    | 5' CACCCGGGTGGAATTCACGTCATCTTGCTCTG 3'       |
|                                             | pGADSec31-F    | 5' GGAGGCCAGTGAATTCATGATCAACTCCGAGGGG 3'     |
|                                             | pGADSec31-R    | 5' CACCCGGGTGGAATTCCTACATTCTGAAATTCTG 3'     |
|                                             | pGBT9-Got1p-F  | 5' ACTGTATCGCCGGAATTCATGTGGCTCACAGAGGCT 3'   |
|                                             | pGBT9-Got1p-R  | 5' ACGGATCCCCGGGAATTCCTATACTGGCAGAACCCT 3'   |
|                                             | pGBT9-hGOT1A-F | 5' ACTGTATCGCCGGAATTCATGATCTCCATCACCGAA 3'   |
|                                             | pGBT9-hGOT1A-R | 5' ACGGATCCCCGGGAATTCCTCAGACCATCGAGCTAGT3'   |
|                                             | pGBT9-hGOT1B-F | 5' ACTGTATCGCCGGAATTCATGATCTCCTTAACGGAC 3'   |
|                                             | pGBT9-hGOT1B-R | 5' ACGGATCCCCGGGAATTCCTATAACCATATTGTTGCT 3'  |
|                                             |                | 5'                                           |
|                                             | pGADSec23p-F   | ATGGAGGCCAGTGAATTCATGGACTTCGAGACTAATGA3'     |
|                                             |                | 5'                                           |
|                                             |                | CCCACCCGGGTGGAATTCCTATGCCTGACCAGAGACGG       |
|                                             | pGADSec23p-R   | 3'                                           |
|                                             | pGADhSec23b-F  | 5' ATGGAGGCCAGTGAATTCATGGCGACATACCTGGAG 3'   |
|                                             | pGADhSec23b-R  | 5' CCCACCCGGGTGGAATTCCTAACAGGCACTGGAGAC 3'   |
|                                             | pBT3N-GOT1B-F  | 5' GCCGCCTCGGCCCATGGATGGTTTCCTTCGAGATG 3'    |
|                                             | pBT3N-GOT1B-R  | 5' GTTAGCTACTTACCATGGCTACACTGGAACCCGTTT 3'   |
|                                             |                | 5' TTCCAGATTACGCTGGATCCATGGAGGAGACGTCGACG    |
|                                             | pPR3N-Sec23a-F | 3'                                           |
|                                             |                | 5' TGATACCACTGCTTGGATCCTTAGCTTGGTTCAGGTGG    |
|                                             | pPR3N-Sec23a-R | 3'                                           |
|                                             | pPR3N-Sec23b-F | 5' TTCCAGATTACGCTGGATCCATGTCTGAGTTCCTGGAT 3' |
|                                             |                | 5' TGATACCACTGCTTGGATCCCTACTGAACTGCCAGCCG    |
|                                             | pPR3N-Sec23b-R | 3'                                           |
|                                             |                | 5' TTCCAGATTACGCTGGATCCATGGCGGCCGATCCCTCC    |
|                                             | pPR3N-Sec23c-F | 3'                                           |
|                                             |                | 5' TGATACCACTGCTTGGATCCTTAGGACTGAACGGCCAG    |
|                                             | pPR3N-Sec23c-R | 3'                                           |
| qPCR primers<br>for <i>OsSec23</i><br>genes | OsSec23a-F     | 5' TGGCAAGTGTGCAGGATGATGTTG 3'               |
|                                             | OsSec23a-R     | 5' ATAGCATCTGAGGCAGTTCTGGCA 3'               |
|                                             | OsSec23b-F     | 5' GATCAGCAAGGGCATGAGGCATTT 3'               |

|            |                            |                                            |
|------------|----------------------------|--------------------------------------------|
|            | OsSec23b-R                 | 5' TGATCACACACGACCAAACGAGGA 3'             |
|            | OsSec23c-F                 | 5' AGGACGATTCCTGCTCCAAGACT 3'              |
|            | OsSec23c-R                 | 5' ACCTGGAGGAACATCATGTGCTGA 3'             |
|            | Y <sup>N</sup> -GOT1B-F    | 5' GAAGGGAGGTACTAGTATGGTTTCCTTCGAGATGAA 3' |
|            | Y <sup>N</sup> -GOT1B-R    | 5' TAGAAGCCATACTAGTCTACACTGGAACCCGTTTT 3'  |
|            | Y <sup>C</sup> -OsSec23c-F | 5' CAAGGGCGGTACTAGTATGGCGGCCGATCCCTCC 3'   |
| BiFC assay | Y <sup>C</sup> -OsSec23c-R | 5' TAGAAGCCATACTAGTTTAGGACTGAACGGCCAG 3'   |
|            | Y <sup>C</sup> -OsSec23a-F | 5' CAAGGGCGGTACTAGTTTAGCTTGTTTCAGGTGG 3'   |
|            | Y <sup>C</sup> -OsSec23a-R | 5' TAGAAGCCATACTAGTTTAGCTTGTTTCAGGTGG 3'   |
|            | Y <sup>C</sup> -OsSec23b-F | 5' CAAGGGCGGTACTAGTATGTCTGAGTTCCCTGGAT 3'  |
|            | Y <sup>C</sup> -OsSec23b-R | 5' TAGAAGCCATACTAGTCTACTGAACTGCCAGCCG 3'   |
